# Supplementary material for: Adaptation to genome decay in the structure of the smallest eukaryotic ribosome
Source: PubMed Central journal article supplement (PMC8807834; doi:10.1038/s41467-022-28281-0), 2022-02-01
Supplement: 41467_2022_28281_MOESM3_ESM.pdf [file 41467_2022_28281_MOESM3_ESM.pdf]

### **Description of Additional Supplementary Files**

File Name: Supplementary Data 1

Description: A script to retrieve sequences of ribosomal proteins from UniProt.

File Name: Supplementary Data 2

Description: Multiple sequence alignments of eukaryotic eL20 sequences.

File Name: Supplementary Data 3

Description: Multiple sequence alignments of eukaryotic uL15 sequences.
